# Supplementary material for: Polymer-modified mesoporous silica microcubes (P@MSMCs) for the synergistic oxidative entrapment of Ag(i), Ti(iv), and Zn(ii) from natural river water
Source: Royal Society of Chemistry journal article supplement (doi:10.1039/d0dt01274b), 2020-01-01
Supplement: d0dt01274b1.pdf [file d0dt01274b1.pdf]

## **Polymer modified mesoporous silica microcubes (P@MSMCs) for synergistic oxidative entrapment of Ag(I), Ti(IV) and Zn(II) from natural river water**

Shanaz Jahan<sup>a\*</sup>, Muhammad Salman<sup>b</sup>, Yatimah Binti Alias<sup>cd\*</sup>, Ahmad Farid Bin Abu Bakar<sup>a</sup>, Farrukh Mansoor<sup>e</sup>, Shamsa Kanwal<sup>e</sup>

<sup>a</sup> Department of Geology, Faculty of Science, University of Malaya, Kuala Lumpur 50603, Malaysia.

<sup>b</sup> Department of Polymer Engineering, Xian Jiaotong University, Shanxi province, China.

<sup>c</sup> Department of Chemistry, Faculty of Science, University of Malaya, Kuala Lumpur 50603, Malaysia.

<sup>d</sup> University Malaya Centre for Ionic Liquids (UMCIL), University of Malaya, Kuala Lumpur 50603, Malaysia.

<sup>e</sup> Department of Chemistry, Khawja Fareed University of Engineering and Information Technology, Rahim Yar Kahan, Pakistan.

Corresponding author e-mail: [jshanaz01@gmail.com](mailto:jshanaz01@gmail.com), [yatimah70@um.edu.my](mailto:yatimah70@um.edu.my)

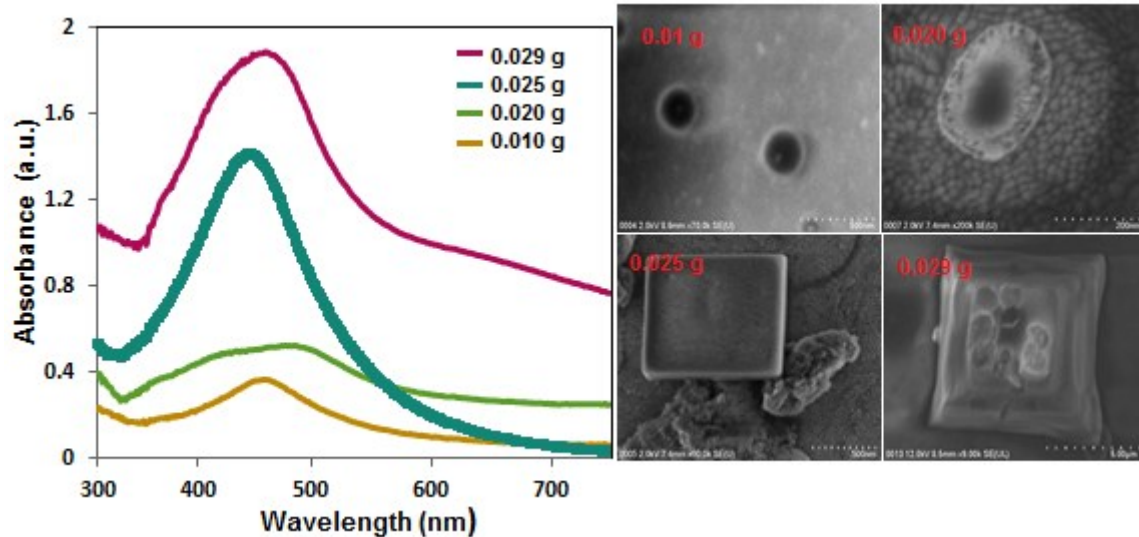

Figure S1: The UV-visible and FESEM analysis for the optimization of FeCl<sub>3</sub> concentration during the synthesis of P@SMCs.

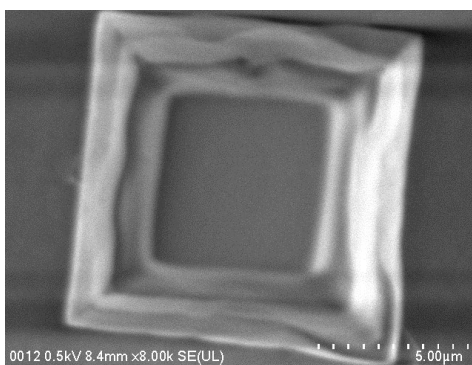

Figure S2: FESEM image of P@SMCs with polymer layer at the surface.

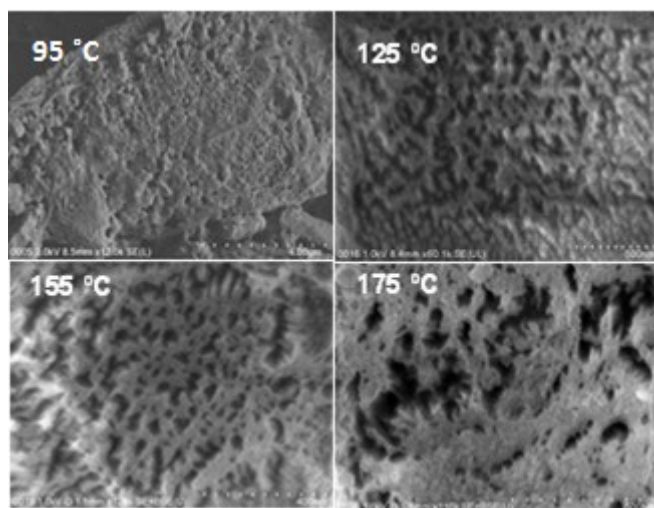

Figure S3: Porosity control of P@MSMC at different temperature values.

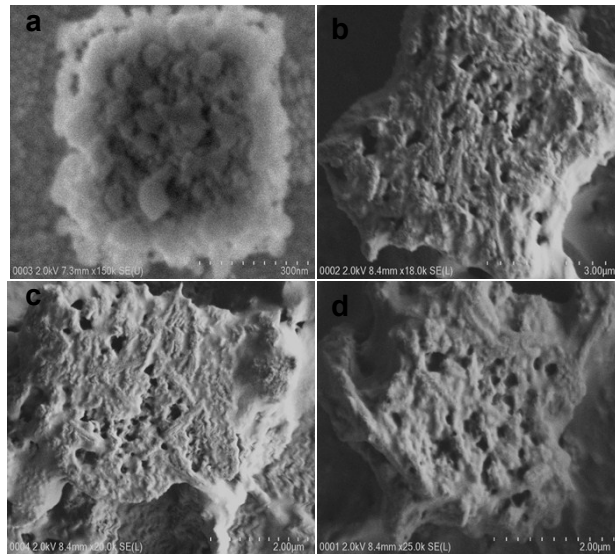

**Figure S4:** The corresponding FESEM images of the disintegration of polymer layer at temperature 170 °C (a), 180 °C (b), 190 °C (c) and 200 °C.

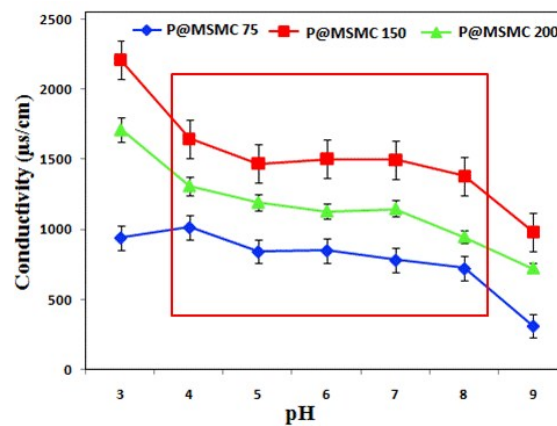

**Figure S5:** The stability of P@MSMC (synthesized at 75 °C, 150 °C & 200 °C) at variable solution pH. The error bars representing the standard error of three replicate analysis.

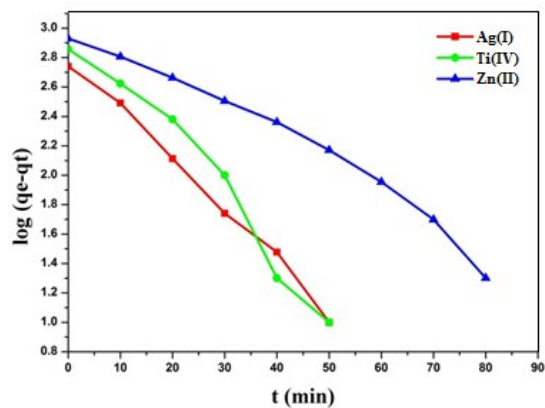

**Figure S6:** The Pseudo-first-order kinetics plots for metal ions adsorption on P@MSMC ( $R^2$  value = 0.993, 0.964 and 0.966 for Ag, Ti and Zn, respectively).

**Table S1\***. The physical characteristics and ionic composition of natural River water.

| Physical Parameters      |             |              |
|--------------------------|-------------|--------------|
| pH                       | DO (mg/L)   | TSS (mg/L)   |
| 6.86 ± 0.04              | 11.5 ± 0.02 | 100 ± 0.53   |
| Ionic Composition (mg/L) |             |              |
| Anions                   | Fluoride    | 0.364 ± 0.01 |
|                          | Chloride    | 34.15 ± 0.61 |
|                          | Carbonate   | 30.47 ± 0.01 |
|                          | Bromide     | 0.998 ± 0.03 |
|                          | Nitrate     | 4.504 ± 0.21 |
|                          | Phosphate   | 2.194 ± 0.02 |
|                          | Sulfate     | 36.32 ± 0.03 |
| Cations                  | Sodium      | 31.70 ± 0.11 |
|                          | Potassium   | 50.17 ± 0.02 |
|                          | Calcium     | 26.11 ± 0.04 |
|                          | Magnesium   | 41.05 ± 0.02 |

\*All values are recorded at 28 °C using portable meter.

**Table S2:** Pseudo-first-order and pseudo-second-order kinetic model constants of as-prepared P@MSMC

| Metal ions | $q_{e,exp}$ (mgg <sup>-1</sup> ) | Pseudo-first order model         |                                               |                |          | Pseudo-second order model        |                                                                |                |          |
|------------|----------------------------------|----------------------------------|-----------------------------------------------|----------------|----------|----------------------------------|----------------------------------------------------------------|----------------|----------|
|            |                                  | $q_{e,exp}$ (mgg <sup>-1</sup> ) | $K_1$ (x 10 <sup>-2</sup> min <sup>-1</sup> ) | R <sup>2</sup> | RMSE (%) | $q_{e,exp}$ (mgg <sup>-1</sup> ) | $K_1$ (x 10 <sup>-3</sup> mg <sup>-1</sup> min <sup>-1</sup> ) | R <sup>2</sup> | RMSE (%) |
| Ag         | 520                              | 436                              | 0.15                                          | 0.993          | 21.3     | 519                              | 1.1                                                            | 0.999          | 0.23     |
| Ti         | 720                              | 648                              | 0.11                                          | 0.964          | 53.2     | 722                              | 7.6                                                            | 0.999          | 4.5      |
| Zn         | 850                              | 763                              | 0.12                                          | 0.966          | 8.2      | 852                              | 4.2                                                            | 0.998          | 1.9      |

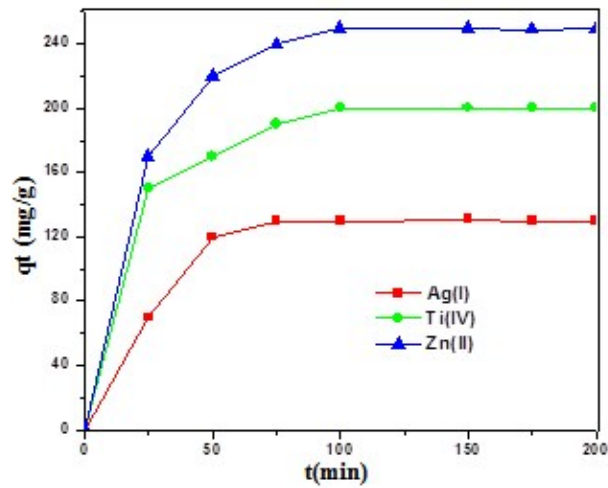

**Figure S7:** Adsorption potential of iron-free spherical silica structure for Ag(I), Ti(IV) and Zn(II) at 28 °C and at pH values 5, 6, and 6, respectively.

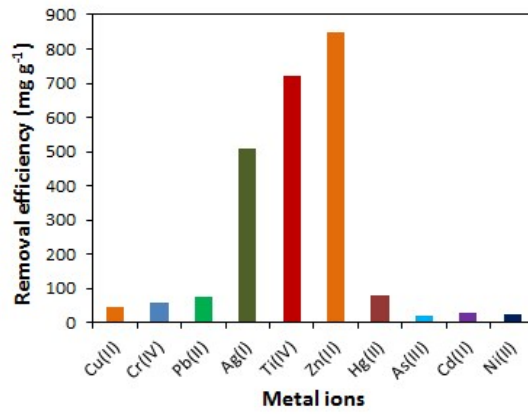

**Figure S8:** Adsorption efficiency of P@MSMC for various other metal ions at pH 6.

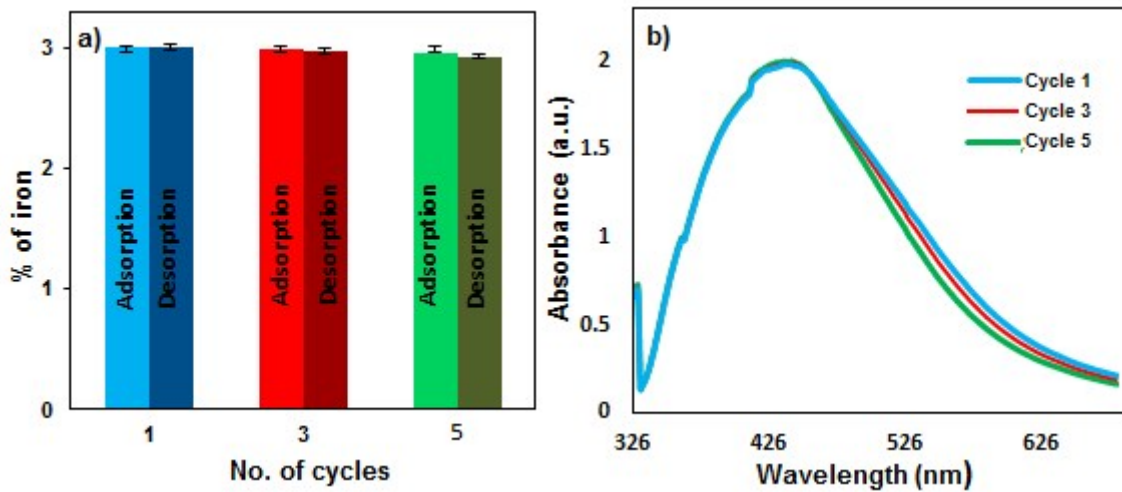

**Figure S9:** EDX elemental percentage of iron (a) and the UV-visible absorption spectra of P@MSMCs (b) after 1, 3 and 5 adsorption/desorption cycles. The error bars representing the standard error of three successive trials.
